# Supplementary material for: Assessment of bacterial and viral gut communities in healthy and tumoral colorectal tissue using RNA and DNA deep-sequencing
Source: Research Square preprint supplement (doi:10.21203/rs.3.rs-2650737/v1), 2023-03-17
Supplement: Supplementary file 1 [file 553f7575fcecfa94cdd7ff44.xlsx]

## Sheet: Supplementary_table_S1
Supplementary table S1. Relative abundance of bacterial species filtered in DNA. Statistical significance markers: * p<0.1; ** p<0.05; *** p<0.01
Group	Mucosa					Tumor
Species	N	Median	Min	Max	N	Median	Min	Max	Test
Acinetobacter-haemolyticus (ID 29430)	10	0.001	0	0.003	10	0.002	0	0.006	F=1.92
Alistipes-communis (ID 2585118)	10	0	0	0.002	10	0	0	0.002	F=0.435
Alistipes-finegoldii (ID 214856)	10	0	0	0	10	0	0	0.001	F=2.162
Bacillus-cereus (ID 1396)	10	0.001	0.001	0.002	10	0.002	0.001	0.003	F=3.513*
Bacteroides-caccae (ID 47678)	10	0	0	0.001	10	0	0	0.001	F=0.207
Bacteroides-fragilis (ID 817)	10	0	0	0.007	10	0.002	0	0.124	F=2.112
Bacteroides-ovatus (ID 28116)	10	0	0	0.001	10	0	0	0.013	F=2.115
Bacteroides-sp. HF-5141 (ID 2650158)	10	0	0	0	10	0	0	0.001	F=1.884
Bacteroides-sp. M10 (ID 2763022)	10	0	0	0	10	0	0	0.001	F=2.088
Bacteroides-thetaiotaomicron (ID 818)	10	0	0	0.004	10	0.001	0	0.005	F=0.885
Bacteroides-uniformis (ID 820)	10	0	0	0.001	10	0	0	0.001	F=1.893
Bacteroides-xylanisolvens (ID 371601)	10	0	0	0	10	0	0	0.004	F=2.143
Burkholderia-dolosa (ID 152500)	10	0.001	0.001	0.006	10	0.007	0.001	0.023	F=10.222***
Burkholderia-pseudomallei (ID 28450)	10	0.001	0.001	0.001	10	0.003	0.001	0.004	F=23.435***
Cupriavidus-oxalaticus (ID 96344)	10	0	0	0.001	10	0.001	0	0.003	F=15.153***
Cupriavidus-taiwanensis (ID 164546)	10	0	0	0	10	0.001	0	0.001	F=19.638***
Curtobacterium-sp. Csp2 (ID 2495430)	10	0.001	0.001	0.003	10	0.002	0.001	0.006	F=3.931*
Enterocloster-clostridioformis (ID 1531)	10	0	0	0	10	0	0	0.002	F=1.119
Enterococcus-faecium (ID 1352)	10	0.001	0	0.003	10	0.001	0	0.006	F=0.963
Escherichia-coli (ID 562)	10	0.001	0.001	0.002	10	0.002	0.001	0.004	F=10.511***
Faecalibacterium-prausnitzii (ID 853)	10	0	0	0	10	0	0	0.001	F=2.851
Fusobacterium-nucleatum (ID 851)	10	0	0	0	10	0	0	0.005	F=2.021
Fusobacterium-pseudoperiodonticum (ID 2663009)	10	0	0	0	10	0	0	0.001	F=1.263
Haemophilus-influenzae (ID 727)	10	0	0	0	10	0	0	0.006	F=1.005
Halomonas-sp. JS92-SW72 (ID 2306583)	10	0.003	0.001	0.006	10	0.003	0.002	0.006	F=0.49
Helicobacter-cinaedi (ID 213)	10	0	0	0.001	10	0	0	0.001	F=1.832
Hydrogenophaga-sp. NH-16 (ID 2184519)	10	0.001	0	0.002	10	0.001	0	0.002	F=0.896
Klebsiella-oxytoca (ID 571)	10	0	0	0.001	10	0	0	0.001	F=0.46
Klebsiella-pneumoniae (ID 573)	10	0.012	0.009	0.014	10	0.021	0.011	0.033	F=13.831***
Klebsiella-variicola (ID 244366)	10	0.002	0.002	0.004	10	0.004	0.002	0.009	F=9.333***
Komagataeibacter-rhaeticus (ID 215221)	10	0	0	0.418	10	0.001	0	0.626	F=0.584
Neisseria-gonorrhoeae (ID 485)	10	0	0	0.001	10	0.001	0	0.001	F=10.249***
Neptunomonas-phycophila (ID 1572645)	10	0	0	0.003	10	0.001	0	0.006	F=1.305
Odoribacter-splanchnicus (ID 28118)	10	0	0	0	10	0	0	0.001	F=2.002
Parabacteroides-distasonis (ID 823)	10	0	0	0.001	10	0	0	0.004	F=2.648
Paracoccus-mutanolyticus (ID 1499308)	10	0.001	0.001	0.001	10	0.001	0.001	0.002	F=14.208***
Pasteurella-multocida (ID 747)	10	0.016	0.013	0.018	10	0.028	0.016	0.041	F=17.984***
Phocaeicola-dorei (ID 357276)	10	0	0	0.001	10	0.001	0	0.013	F=1.582
Phocaeicola-vulgatus (ID 821)	10	0.001	0	0.004	10	0	0	0.008	F=0.011
Plantactinospora-sp. BB1 (ID 2071627)	10	0	0	0.001	10	0	0	0.002	F=0.085
Polynucleobacter-necessarius (ID 576610)	10	0	0	0	10	0.053	0	0.107	F=24.652***
Pseudoalteromonas-sp. 3J6 (ID 649161)	10	0.421	0	0.602	10	0	0	0.489	F=3.641*
Pseudoalteromonas-sp. Scap06 (ID 2589991)	10	0	0	0.001	10	0	0	0.003	F=1.019
Pseudomonas-fluorescens (ID 294)	10	0	0	0.003	10	0.001	0	0.006	F=1.405
Ralstonia-solanacearum (ID 305)	10	0.01	0.008	0.241	10	0.019	0.008	0.427	F=0.309
Salmonella-enterica (ID 28901)	10	0.008	0.005	0.434	10	0.016	0.006	0.731	F=0.216
Serratia-sp. 3ACOL1 (ID 2448483)	10	0	0	0.005	10	0.001	0	0.01	F=0.966
Shewanella-sp. Scap07 (ID 2589987)	10	0	0	0.001	10	0	0	0.002	F=1.058
Staphylococcus-aureus (ID 1280)	10	0.161	0.069	0.504	10	0.217	0.087	0.827	F=0.853
Staphylococcus-haemolyticus (ID 1283)	10	0.002	0.002	0.003	10	0.004	0.003	0.006	F=14.825***
Streptomyces-sp. ICC1 (ID 2099583)	10	0.001	0	0.431	10	0.001	0	0.589	F=0.095
Streptomyces-sp. ICC4 (ID 2099584)	10	0.001	0	0.502	10	0	0	0.003	F=5.95**
Veillonella-parvula (ID 29466)	10	0	0	0	10	0	0	0.002	F=1.117
Vibrio-sp. Scap24 (ID 2589990)	10	0	0	0.279	10	0	0	0.485	F=0.688
Xanthomonas-citri (ID 346)	10	0.001	0.001	0.005	10	0.003	0.001	0.011	F=3.253*

## Sheet: Supplementary_table_S2
Supplementary table S2. Relative abundance of virus species filtered in DNA. Statistical significance markers: * p<0.1; ** p<0.05; *** p<0.01
Group	Mucosa				Tumor
Species	N	Median	Min	Max	N	Median	Min	Max	Test
Acionnavirus-Synechococcus phage S-CAM8 (ID 754038)	10	0	0	0.001	10	0.001	0	0.001	F=7.249**
Aveparvovirus-Gruiform aveparvovirus 1 (ID 2734308)	3	0	0	0.004	2	0	0	0.004	F=0.125
Eganvirus-Salmonella phage SW9 (ID 2592223)	10	0.001	0.001	0.003	10	0.002	0.001	0.003	F=0.145
Gorganvirus-Proteus virus Isfahan (ID 2560650)	10	0.21	0.173	0.564	10	0.202	0.167	0.484	F=0.117
Aeribacillus phage AP45 (ID 1913112)	2	0	0	0.04	2	0	0	0.081	F=0.245
BeAn 58058 virus (ID 67082)	10	0.081	0.028	0.168	10	0.106	0.066	0.179	F=1.4
Human endogenous retrovirus K (ID 45617)	10	0.029	0.015	0.066	10	0.04	0.026	0.059	F=0.693
uncultured crAssphage (ID 1211417)	5	0	0	0.009	7	0	0	0.001	F=0.463
Orthobunyavirus-Shamonda orthobunyavirus (ID 159150)	10	0.178	0.077	0.265	10	0.195	0.07	0.281	F=0.475
Orthobunyavirus-Simbu orthobunyavirus (ID 35306)	10	0.43	0.276	0.517	10	0.4	0.261	0.492	F=1.248

## Sheet: Supplementary_table_S3
Supplementary table S3. Relative abundance of bacterial species filtered in RNA. Statistical significance markers: * p<0.1; ** p<0.05; *** p<0.01
Group	Mucosa				Tumor
Species	N	Median	Min	Max	N	Median	Min	Max	Test
Acidihalobacter-ferrooxydans (ID 1765967)	10	0	0	0.001	10	0.001	0	0.001	F=0.457
Acinetobacter-haemolyticus (ID 29430)	10	0.001	0	0.002	10	0	0	0.002	F=0
Alistipes-communis (ID 2585118)	10	0	0	0.002	10	0	0	0.002	F=0.257
Alistipes-dispar (ID 2585119)	9	0	0	0	10	0	0	0.002	F=1.078
Alloprevotella-sp. E39 (ID 2133944)	10	0	0	0	10	0	0	0.001	F=1.91
Anabaena-sp. YBS01 (ID 2490939)	10	0.002	0.002	0.005	10	0.004	0	0.004	F=0.179
Anaerobutyricum-hallii (ID 39488)	10	0	0	0.001	10	0	0	0.001	F=0.305
Anaerostipes-hadrus (ID 649756)	10	0	0	0.001	10	0	0	0.001	F=3.291*
Anaerotignum-propionicum (ID 28446)	10	0	0	0	10	0	0	0.002	F=2.156
Arabia-massiliensis (ID 1870985)	10	0.241	0	0.471	10	0	0	0	F=26.021***
Bacillus-cereus (ID 1396)	10	0.036	0.015	0.085	10	0.029	0.011	0.052	F=1.721
Bacillus-thuringiensis (ID 1428)	10	0.001	0.001	0.003	10	0.001	0.001	0.002	F=1.599
Bacteroides-fragilis (ID 817)	10	0	0	0.006	10	0	0	0.096	F=1.088
Bacteroides-ovatus (ID 28116)	10	0	0	0	10	0	0	0.005	F=1.092
Bacteroides-thetaiotaomicron (ID 818)	10	0	0	0.002	10	0	0	0.001	F=0.052
Bacteroides-xylanisolvens (ID 371601)	10	0	0	0	10	0	0	0.001	F=1.3
Bifidobacterium-longum (ID 216816)	10	0	0	0.004	10	0	0	0	F=1.014
Blautia-sp. SC05B48 (ID 2479767)	10	0	0	0.003	10	0	0	0.003	F=0.052
Burkholderia-dolosa (ID 152500)	10	0.005	0.003	0.014	10	0.006	0.001	0.008	F=0.295
Capnocytophaga-endodontalis (ID 2708117)	9	0	0	0	10	0	0	0.012	F=0.977
Chlorobaculum-tepidum (ID 1097)	10	0.001	0	0.007	10	0.001	0	0.002	F=1.461
Clostridium-botulinum (ID 1491)	10	0.001	0	0.001	10	0.001	0	0.004	F=6.903**
Cupriavidus-oxalaticus (ID 96344)	10	0.001	0.001	0.002	10	0.001	0.001	0.001	F=0.959
Curtobacterium-sp. Csp2 (ID 2495430)	10	0.008	0.007	0.018	10	0.013	0.002	0.016	F=0.088
Desulfovibrio-piger (ID 901)	10	0	0	0.002	10	0	0	0	F=1.051
Enterocloster-bolteae (ID 208479)	10	0	0	0.003	10	0	0	0.002	F=0.018
Enterococcus-faecium (ID 1352)	10	0.001	0.001	0.003	10	0.002	0.001	0.002	F=1.513
Escherichia-coli (ID 562)	10	0.001	0.001	0.002	10	0.001	0	0.002	F=0.709
Faecalibacterium-prausnitzii (ID 853)	10	0	0	0.004	10	0	0	0.005	F=0.154
Fusobacterium-nucleatum (ID 851)	10	0	0	0	10	0	0	0.022	F=2.574
Haemophilus-influenzae (ID 727)	9	0	0	0	10	0	0	0.001	F=0.944
Halomonas-sp. JS92-SW72 (ID 2306583)	10	0.093	0.058	0.432	10	0.094	0.073	0.179	F=0.435
Hungatella-hathewayi (ID 154046)	10	0	0	0	10	0	0	0.001	F=1.597
Hydrogenophaga-sp. NH-16 (ID 2184519)	10	0.032	0.006	0.15	10	0.019	0.004	0.041	F=3.327*
Klebsiella-pneumoniae (ID 573)	10	0.003	0.002	0.009	10	0.004	0.003	0.008	F=0.14
Klebsiella-variicola (ID 244366)	10	0.022	0.018	0.052	10	0.037	0.006	0.045	F=0.035
Komagataeibacter-rhaeticus (ID 215221)	10	0	0	0.411	10	0	0	0.513	F=0.024
Lachnoanaerobaculum-umeaense (ID 617123)	10	0	0	0	10	0	0	0.001	F=3.019*
Mediterraneibacter-[Ruminococcus] gnavus (ID 33038)	10	0	0	0.002	10	0	0	0	F=0.546
Neptunomonas-phycophila (ID 1572645)	10	0.001	0	0.004	10	0.001	0	0.002	F=0.15
Parabacteroides-distasonis (ID 823)	10	0	0	0.002	10	0	0	0.001	F=0.025
Paraburkholderia-fungorum (ID 134537)	10	0.006	0.001	0.028	10	0.004	0.001	0.008	F=3.715*
Parvimonas-micra (ID 33033)	10	0	0	0	10	0	0	0.008	F=1.37
Pasteurella-multocida (ID 747)	10	0.001	0	0.004	10	0.002	0.001	0.006	F=4.278*
Phocaeicola-dorei (ID 357276)	10	0	0	0	10	0	0	0.006	F=1.523
Phocaeicola-vulgatus (ID 821)	10	0	0	0.005	10	0	0	0.002	F=0.682
Plantactinospora-sp. BB1 (ID 2071627)	10	0	0	0.002	10	0	0	0.002	F=0.308
Pseudoalteromonas-sp. Scap25 (ID 2589992)	10	0.001	0.001	0.002	10	0.002	0	0.002	F=1.157
Pseudomonas-fluorescens (ID 294)	10	0.001	0.001	0.004	10	0.002	0.001	0.003	F=0.354
Ralstonia-pickettii (ID 329)	10	0.001	0	0.002	10	0.001	0	0.001	F=1.339
Ralstonia-solanacearum (ID 305)	10	0.002	0.001	0.239	10	0.003	0.001	0.202	F=0.056
Ruthenibacterium-lactatiformans (ID 1550024)	10	0	0	0	10	0	0	0.002	F=0.866
Salmonella-enterica (ID 28901)	10	0.022	0.015	0.456	10	0.034	0.013	0.575	F=0.452
Serratia-sp. 3ACOL1 (ID 2448483)	10	0.002	0.001	0.007	10	0.002	0.001	0.004	F=0.517
Shewanella-sp. Scap07 (ID 2589987)	10	0.001	0	0.004	10	0.001	0	0.002	F=0.24
Staphylococcus-aureus (ID 1280)	10	0.182	0.097	0.528	10	0.212	0.036	0.703	F=0.182
Staphylococcus-haemolyticus (ID 1283)	10	0	0	0.001	10	0	0	0.001	F=2.011
Streptomyces-sp. ICC1 (ID 2099583)	10	0.001	0	0.444	10	0.001	0	0.531	F=0.014
Streptomyces-sp. ICC4 (ID 2099584)	10	0.001	0	0.003	10	0.002	0	0.449	F=5.974**
Sutterella-faecalis (ID 2584944)	10	0	0	0.001	10	0	0	0.001	F=0.001
Treponema-brennaborense (ID 81028)	7	0	0	0	10	0	0	0.003	F=1.814
Treponema-socranskii (ID 53419)	9	0	0	0	10	0	0	0.003	F=1.058
Vibrio-sp. Scap24 (ID 2589990)	10	0.001	0	0.312	10	0.001	0	0.352	F=0.008
Xanthomonas-citri (ID 346)	10	0.007	0.006	0.019	10	0.012	0.002	0.015	F=0.144

## Sheet: Supplementary_table_S4
Supplementary table S2. Relative abundance of virus species filtered in RNA. Statistical significance markers: * p<0.1; ** p<0.05; *** p<0.01
Group	Mucosa				Tumor
Species	N	Median	Min	Max	N	Median	Min	Max	Test
Gorganvirus-Proteus virus Isfahan (ID 2560650)	10	0.177	0.086	0.622	10	0.208	0.102	0.272	F=0.234
Aeribacillus phage AP45 (ID 1913112)	3	0	0	0.005	3	0	0	0.003	F=0.809
BeAn 58058 virus (ID 67082)	10	0	0	0.001	10	0	0	0.001	F=4.918**
Human endogenous retrovirus K (ID 45617)	10	0	0	0.001	10	0	0	0.001	F=6.256**
Orthobunyavirus-Shamonda orthobunyavirus (ID 159150)	10	0.31	0.088	0.386	10	0.176	0.116	0.372	F=3.012*
Orthobunyavirus-Simbu orthobunyavirus (ID 35306)	10	0.498	0.285	0.727	10	0.599	0.43	0.727	F=3.787*
